# Supplementary material for: Comprehensive Analysis of Hepatitis B Virus Promoter Region Mutations
Source: Preprints.org preprint supplement (doi:10.20944/preprints201810.0314.v1), 2018-10-15
Supplement: Supplementary file 1 [file supplementary]

**Supplementary Table 1.** Variant frequencies within the X and core promoter binding regions. Values reported to values 0.5%-99.5%; values between 5-95% are highlighted in green.

| <u>X promoter:</u> 1101-1121 |          |                   |                       |
|------------------------------|----------|-------------------|-----------------------|
| Genotype                     | Position | Variant Frequency | Variant Nucleotide(s) |
| A                            | 1113     | 4.40%             | C                     |
| A                            | 1113     | 95.40%            | T                     |
| B                            | 1117     | 99.40%            | A                     |
| B                            | 1117     | 0.60%             | G                     |
| B                            | 1116     | 86.00%            | A                     |
| B                            | 1116     | 2.60%             | C                     |
| B                            | 1116     | 11.40%            | G                     |
| B                            | 1113     | 7.70%             | C                     |
| B                            | 1113     | 91.60%            | T                     |
| B                            | 1108     | 98.00%            | A                     |
| B                            | 1108     | 0.70%             | C                     |
| B                            | 1108     | 1.10%             | G                     |
| B                            | 1107     | 99.10%            | C                     |
| B                            | 1107     | 0.90%             | T                     |
| B                            | 1103     | 99.30%            | A                     |
| B                            | 1103     | 0.70%             | G                     |
| C                            | 1113     | 0.70%             | C                     |
| C                            | 1113     | 0.70%             | G                     |
| C                            | 1113     | 98.40%            | T                     |
| C                            | 1108     | 94.30%            | A                     |
| C                            | 1108     | 3.80%             | C                     |
| C                            | 1108     | 1.00%             | G                     |
| C                            | 1108     | 1.00%             | T                     |
| C                            | 1105     | 99.30%            | C                     |
| C                            | 1105     | 0.50%             | G                     |
| C                            | 1104     | 33.70%            | C                     |
| C                            | 1104     | 66.00%            | G                     |
| C                            | 1103     | 46.90%            | A                     |
| C                            | 1103     | 53.00%            | G                     |
| C                            | 1102     | 2.00%             | A                     |
| C                            | 1102     | 97.40%            | C                     |
| C                            | 1101     | 2.30%             | C                     |
| C                            | 1101     | 97.60%            | T                     |
| D                            | 1117     | 98.60%            | A                     |
| D                            | 1117     | 0.50%             | G                     |
| D                            | 1117     | 0.50%             | T                     |
| D                            | 1108     | 99.30%            | A                     |
| D                            | 1108     | 0.50%             | C                     |
| D                            | 1101     | 0.60%             | C                     |
| D                            | 1101     | 99.30%            | T                     |

|   |      |        |   |
|---|------|--------|---|
| E | 1113 | 32.00% | C |
| E | 1113 | 67.60% | T |
| E | 1110 | 1.60%  | A |
| E | 1110 | 98.00% | G |
| E | 1108 | 88.00% | A |
| E | 1108 | 10.40% | C |
| E | 1108 | 1.60%  | G |
| E | 1104 | 1.60%  | A |
| E | 1104 | 98.40% | G |
| F | 1117 | 98.80% | A |
| F | 1117 | 0.80%  | G |
| F | 1108 | 98.80% | A |
| F | 1108 | 1.00%  | C |
| H | 1116 | 96.20% | A |
| H | 1116 | 3.80%  | C |
| H | 1108 | 96.20% | A |
| H | 1108 | 3.80%  | C |

3

4 NREBP: nts 1611-1619

| Genotype | Position | Variant Frequency | Variant Nucleotide(s) |
|----------|----------|-------------------|-----------------------|
| A        | 1613     | 4.90%             | A                     |
| A        | 1613     | 95.10%            | G                     |
| A        | 1612     | 90.20%            | A                     |
| A        | 1612     | 9.80%             | C                     |
| B        | 1617     | 99.40%            | A                     |
| B        | 1617     | 0.60%             | C                     |
| B        | 1613     | 19.70%            | A                     |
| B        | 1613     | 80.30%            | G                     |
| B        | 1612     | 98.90%            | A                     |
| B        | 1612     | 0.90%             | G                     |
| C        | 1613     | 22.70%            | A                     |
| C        | 1613     | 77.30%            | G                     |
| D        | 1613     | 7.30%             | A                     |
| D        | 1613     | 92.70%            | G                     |
| E        | 1618     | 98.80%            | C                     |
| E        | 1618     | 1.20%             | T                     |
| E        | 1613     | 5.70%             | A                     |
| E        | 1613     | 94.30%            | G                     |
| F        | 1613     | 2.00%             | A                     |
| F        | 1613     | 98.00%            | G                     |
| G        | 1617     | 5.10%             | A                     |
| G        | 1617     | 94.90%            | G                     |
| G        | 1613     | 97.40%            | A                     |
| G        | 1613     | 2.60%             | G                     |
| H        | 1617     | 98.10%            | A                     |

|   |                                     |         |                   |                       |
|---|-------------------------------------|---------|-------------------|-----------------------|
| 5 | H                                   | 1617    | 1.90%             | C                     |
| 6 | <u>C/EBP-HNF4(1): nts 1644-1672</u> |         |                   |                       |
|   | Genotype                            | Maximum | Variant Frequency | Variant Nucleotide(s) |
|   | A                                   | 1659    | 98.90%            | A                     |
|   | A                                   | 1659    | 1.00%             | C                     |
|   | A                                   | 1653    | 96.80%            | C                     |
|   | A                                   | 1653    | 3.20%             | T                     |
|   | B                                   | 1645    | 97.10%            | A                     |
|   | B                                   | 1645    | 2.70%             | C                     |
|   | C                                   | 1665    | 0.60%             | A                     |
|   | C                                   | 1665    | 99.40%            | C                     |
|   | C                                   | 1661    | 0.60%             | A                     |
|   | C                                   | 1661    | 99.40%            | G                     |
|   | C                                   | 1659    | 97.00%            | A                     |
|   | C                                   | 1659    | 2.90%             | C                     |
|   | C                                   | 1658    | 1.00%             | A                     |
|   | C                                   | 1658    | 98.70%            | G                     |
|   | C                                   | 1655    | 1.60%             | C                     |
|   | C                                   | 1655    | 98.30%            | T                     |
|   | C                                   | 1653    | 87.80%            | C                     |
|   | C                                   | 1653    | 12.20%            | T                     |
|   | C                                   | 1652    | 95.70%            | A                     |
|   | C                                   | 1652    | 4.30%             | G                     |
|   | C                                   | 1647    | 1.50%             | C                     |
|   | C                                   | 1647    | 98.50%            | G                     |
|   | D                                   | 1665    | 3.00%             | A                     |
|   | D                                   | 1665    | 97.00%            | C                     |
|   | D                                   | 1661    | 1.30%             | A                     |
|   | D                                   | 1661    | 98.70%            | G                     |
|   | D                                   | 1659    | 98.60%            | A                     |
|   | D                                   | 1659    | 1.40%             | C                     |
|   | D                                   | 1655    | 0.50%             | C                     |
|   | D                                   | 1655    | 99.50%            | T                     |
|   | D                                   | 1653    | 90.90%            | C                     |
|   | D                                   | 1653    | 9.10%             | T                     |
|   | D                                   | 1652    | 97.50%            | A                     |
|   | D                                   | 1652    | 2.50%             | G                     |
|   | D                                   | 1647    | 1.90%             | A                     |
|   | D                                   | 1647    | 98.10%            | G                     |
|   | E                                   | 1659    | 98.40%            | A                     |
|   | E                                   | 1659    | 1.60%             | C                     |
|   | E                                   | 1653    | 93.50%            | C                     |
|   | E                                   | 1653    | 6.50%             | T                     |
|   | E                                   | 1652    | 98.80%            | A                     |

|   |      |        |   |
|---|------|--------|---|
| E | 1652 | 0.80%  | G |
| E | 1649 | 98.80% | C |
| E | 1649 | 1.20%  | T |
| E | 1648 | 1.20%  | G |
| E | 1648 | 98.40% | T |
| F | 1665 | 16.10% | A |
| F | 1665 | 83.70% | C |
| F | 1659 | 56.30% | A |
| F | 1659 | 43.50% | C |
| F | 1658 | 12.10% | A |
| F | 1658 | 1.20%  | C |
| F | 1658 | 86.30% | G |
| F | 1655 | 1.60%  | C |
| F | 1655 | 98.20% | T |
| F | 1653 | 97.00% | C |
| F | 1653 | 3.00%  | T |
| F | 1648 | 5.20%  | C |
| F | 1648 | 94.80% | T |
| F | 1646 | 98.60% | A |
| F | 1646 | 1.20%  | G |
| F | 1645 | 1.20%  | A |
| F | 1645 | 98.00% | C |
| F | 1645 | 0.80%  | T |
| G | 1659 | 94.90% | A |
| G | 1659 | 2.60%  | C |
| G | 1659 | 2.60%  | T |
| G | 1653 | 5.10%  | C |
| G | 1653 | 94.90% | T |
| G | 1652 | 94.90% | A |
| G | 1652 | 5.10%  | G |
| G | 1649 | 5.10%  | A |
| G | 1649 | 94.90% | G |
| G | 1648 | 94.90% | A |
| G | 1648 | 5.10%  | T |
| G | 1647 | 94.90% | C |
| G | 1647 | 5.10%  | G |
| G | 1645 | 33.30% | A |
| G | 1645 | 66.70% | G |
| H | 1670 | 96.20% | A |
| H | 1670 | 3.80%  | T |
| H | 1661 | 7.70%  | A |
| H | 1661 | 92.30% | G |
| H | 1658 | 3.80%  | A |
| H | 1658 | 96.20% | G |
| H | 1653 | 92.30% | C |

|   |      |        |   |
|---|------|--------|---|
| H | 1653 | 7.70%  | T |
| H | 1652 | 96.20% | A |
| H | 1652 | 3.80%  | G |
| H | 1647 | 96.20% | A |
| H | 1647 | 3.80%  | C |

7

8 Site1: HNF3(1)-FTF: nts 1679-1700

| Genotype | Maximum | Variant Frequency | Variant Nucleotide(s) |
|----------|---------|-------------------|-----------------------|
| B        | 1688    | 4.20%             | A                     |
| B        | 1688    | 95.60%            | G                     |
| B        | 1687    | 95.70%            | C                     |
| B        | 1687    | 4.30%             | T                     |
| B        | 1683    | 1.00%             | C                     |
| B        | 1683    | 1.20%             | G                     |
| B        | 1683    | 97.80%            | T                     |
| B        | 1680    | 98.90%            | A                     |
| B        | 1680    | 0.90%             | C                     |
| B        | 1679    | 98.90%            | A                     |
| B        | 1679    | 0.90%             | G                     |
| C        | 1688    | 1.40%             | A                     |
| C        | 1688    | 98.60%            | G                     |
| C        | 1680    | 99.00%            | A                     |
| C        | 1680    | 0.90%             | C                     |
| C        | 1679    | 90.80%            | A                     |
| C        | 1679    | 1.30%             | C                     |
| C        | 1679    | 7.70%             | G                     |
| D        | 1694    | 98.00%            | C                     |
| D        | 1694    | 2.00%             | T                     |
| D        | 1679    | 92.90%            | A                     |
| D        | 1679    | 1.90%             | C                     |
| D        | 1679    | 5.10%             | G                     |
| E        | 1693    | 98.80%            | A                     |
| E        | 1693    | 0.80%             | T                     |
| E        | 1691    | 99.20%            | C                     |
| E        | 1691    | 0.80%             | G                     |
| F        | 1700    | 98.80%            | A                     |
| F        | 1700    | 0.80%             | G                     |
| F        | 1699    | 98.80%            | A                     |
| F        | 1699    | 1.20%             | C                     |
| F        | 1697    | 97.20%            | C                     |
| F        | 1697    | 2.40%             | T                     |
| F        | 1695    | 99.20%            | A                     |
| F        | 1695    | 0.80%             | C                     |
| F        | 1694    | 0.80%             | C                     |
| F        | 1694    | 99.20%            | G                     |

|   |      |        |   |
|---|------|--------|---|
| F | 1693 | 0.80%  | A |
| F | 1693 | 99.20% | G |
| F | 1692 | 0.80%  | C |
| F | 1692 | 0.80%  | G |
| F | 1692 | 98.20% | T |
| F | 1689 | 96.60% | A |
| F | 1689 | 3.40%  | C |
| F | 1688 | 33.70% | C |
| F | 1688 | 66.10% | G |
| F | 1687 | 1.20%  | C |
| F | 1687 | 98.40% | T |
| F | 1685 | 99.00% | A |
| F | 1685 | 0.80%  | C |
| F | 1684 | 99.00% | C |
| F | 1684 | 0.80%  | T |
| F | 1682 | 0.80%  | A |
| F | 1682 | 99.20% | G |
| F | 1681 | 99.00% | G |
| F | 1681 | 1.00%  | T |
| F | 1680 | 45.00% | A |
| F | 1680 | 44.40% | C |
| F | 1680 | 4.00%  | G |
| F | 1680 | 6.70%  | T |
| F | 1679 | 98.60% | A |
| F | 1679 | 1.40%  | G |
| G | 1697 | 94.90% | G |
| G | 1697 | 5.10%  | T |
| G | 1695 | 10.30% | A |
| G | 1695 | 5.10%  | C |
| G | 1695 | 84.60% | G |
| G | 1694 | 5.10%  | C |
| G | 1694 | 94.90% | G |
| G | 1693 | 5.10%  | A |
| G | 1693 | 94.90% | G |
| G | 1688 | 94.90% | A |
| G | 1688 | 5.10%  | G |
| G | 1679 | 5.10%  | A |
| G | 1679 | 94.90% | T |
| H | 1681 | 3.80%  | A |
| H | 1681 | 96.20% | G |

9

10 Site 2: HNF3(2)-Sp1(1): nts 1713-1740

| Genotype | Position | Variant Frequency | Variant Nucleotide(s) |
|----------|----------|-------------------|-----------------------|
| A        | 1740     | 66.20%            | C                     |
| A        | 1740     | 33.80%            | T                     |

|   |      |        |   |
|---|------|--------|---|
| A | 1739 | 1.10%  | A |
| A | 1739 | 98.80% | G |
| A | 1727 | 33.30% | A |
| A | 1727 | 66.70% | G |
| A | 1721 | 2.00%  | A |
| A | 1721 | 98.00% | G |
| A | 1719 | 99.00% | G |
| A | 1719 | 0.70%  | T |
| A | 1717 | 1.20%  | A |
| A | 1717 | 98.60% | G |
| B | 1740 | 4.30%  | C |
| B | 1740 | 95.30% | T |
| B | 1739 | 1.80%  | A |
| B | 1739 | 98.20% | G |
| B | 1738 | 97.50% | A |
| B | 1738 | 2.50%  | T |
| B | 1730 | 0.60%  | A |
| B | 1730 | 98.90% | G |
| B | 1727 | 0.50%  | A |
| B | 1727 | 1.90%  | C |
| B | 1727 | 3.20%  | G |
| B | 1727 | 94.40% | T |
| B | 1726 | 38.50% | A |
| B | 1726 | 61.30% | C |
| B | 1725 | 98.70% | A |
| B | 1725 | 1.20%  | G |
| B | 1724 | 0.80%  | C |
| B | 1724 | 99.10% | T |
| B | 1721 | 1.80%  | A |
| B | 1721 | 98.20% | G |
| B | 1719 | 0.60%  | C |
| B | 1719 | 98.60% | G |
| B | 1719 | 0.70%  | T |
| C | 1740 | 1.00%  | C |
| C | 1740 | 98.90% | T |
| C | 1739 | 0.50%  | A |
| C | 1739 | 99.30% | G |
| C | 1730 | 0.70%  | A |
| C | 1730 | 99.30% | C |
| C | 1728 | 1.00%  | A |
| C | 1728 | 99.00% | G |
| C | 1727 | 57.60% | A |
| C | 1727 | 42.20% | G |
| C | 1726 | 99.00% | A |
| C | 1726 | 0.90%  | C |

|   |      |        |   |
|---|------|--------|---|
| C | 1724 | 1.20%  | C |
| C | 1724 | 98.70% | T |
| C | 1721 | 22.80% | A |
| C | 1721 | 77.20% | G |
| C | 1719 | 45.60% | G |
| C | 1719 | 54.30% | T |
| D | 1740 | 0.60%  | C |
| D | 1740 | 99.40% | T |
| D | 1739 | 0.50%  | A |
| D | 1739 | 97.80% | G |
| D | 1739 | 1.70%  | T |
| D | 1730 | 0.90%  | A |
| D | 1730 | 98.50% | C |
| D | 1728 | 1.10%  | A |
| D | 1728 | 98.90% | G |
| D | 1727 | 78.20% | A |
| D | 1727 | 21.70% | G |
| D | 1724 | 5.40%  | C |
| D | 1724 | 94.60% | T |
| D | 1719 | 2.40%  | C |
| D | 1719 | 0.50%  | G |
| D | 1719 | 97.00% | T |
| E | 1727 | 92.20% | A |
| E | 1727 | 7.80%  | G |
| E | 1719 | 1.20%  | G |
| E | 1719 | 98.80% | T |
| E | 1718 | 1.20%  | C |
| E | 1718 | 98.80% | T |
| F | 1740 | 66.10% | C |
| F | 1740 | 33.90% | T |
| F | 1727 | 21.00% | A |
| F | 1727 | 78.60% | G |
| F | 1726 | 98.60% | A |
| F | 1726 | 1.40%  | C |
| F | 1721 | 94.80% | A |
| F | 1721 | 5.20%  | G |
| G | 1739 | 94.90% | A |
| G | 1739 | 5.10%  | G |
| G | 1736 | 94.90% | A |
| G | 1736 | 5.10%  | G |
| G | 1730 | 5.10%  | C |
| G | 1730 | 94.90% | G |
| G | 1727 | 5.10%  | A |
| G | 1727 | 94.90% | T |
| G | 1726 | 5.10%  | A |



|   |      |        |   |
|---|------|--------|---|
| G | 1726 | 94.90% | C |
| G | 1725 | 5.10%  | A |
| G | 1725 | 94.90% | G |
| G | 1721 | 2.60%  | A |
| G | 1721 | 5.10%  | G |
| G | 1721 | 92.30% | T |
| H | 1721 | 88.50% | A |
| H | 1721 | 11.50% | G |

11

12 *Sp1(2)*: nts 1743-1752

| Genotype | Position | Variant Frequency | Variant Nucleotide(s) |
|----------|----------|-------------------|-----------------------|
| B        | 1752     | 53.60%            | A                     |
| B        | 1752     | 2.40%             | C                     |
| B        | 1752     | 42.10%            | G                     |
| B        | 1752     | 1.80%             | T                     |
| B        | 1751     | 1.90%             | A                     |
| B        | 1751     | 97.70%            | G                     |
| B        | 1750     | 98.90%            | A                     |
| B        | 1750     | 0.90%             | T                     |
| B        | 1748     | 1.10%             | A                     |
| B        | 1748     | 98.80%            | G                     |
| B        | 1747     | 99.10%            | A                     |
| B        | 1747     | 0.60%             | C                     |
| C        | 1752     | 96.90%            | A                     |
| C        | 1752     | 2.50%             | T                     |
| D        | 1752     | 83.80%            | A                     |
| D        | 1752     | 13.10%            | C                     |
| D        | 1752     | 2.80%             | T                     |
| E        | 1752     | 95.50%            | A                     |
| E        | 1752     | 4.50%             | C                     |
| F        | 1745     | 98.60%            | G                     |
| F        | 1745     | 1.20%             | T                     |
| G        | 1752     | 5.10%             | A                     |
| G        | 1752     | 94.90%            | T                     |
| G        | 1748     | 5.10%             | G                     |
| G        | 1748     | 94.90%            | T                     |
| G        | 1746     | 94.90%            | A                     |
| G        | 1746     | 5.10%             | G                     |
| G        | 1745     | 94.90%            | C                     |
| G        | 1745     | 5.10%             | G                     |
| H        | 1752     | 11.50%            | C                     |
| H        | 1752     | 88.50%            | T                     |

13

14 *TBP-LSF/HNF4(2)-TBP*: nts 1758-1776

| Genotype | Position | Variant Frequency | Variant Nucleotide(s) |
|----------|----------|-------------------|-----------------------|
|----------|----------|-------------------|-----------------------|

|   |      |        |   |
|---|------|--------|---|
| A | 1773 | 1.60%  | C |
| A | 1773 | 98.40% | T |
| A | 1768 | 2.90%  | A |
| A | 1768 | 0.70%  | G |
| A | 1768 | 96.10% | T |
| A | 1766 | 93.30% | C |
| A | 1766 | 6.10%  | T |
| A | 1764 | 30.60% | A |
| A | 1764 | 69.10% | G |
| A | 1762 | 71.30% | A |
| A | 1762 | 28.50% | T |
| A | 1758 | 1.10%  | C |
| A | 1758 | 98.80% | T |
| B | 1775 | 96.40% | A |
| B | 1775 | 3.10%  | G |
| B | 1773 | 88.40% | C |
| B | 1773 | 11.60% | T |
| B | 1768 | 2.30%  | A |
| B | 1768 | 97.60% | T |
| B | 1766 | 97.60% | C |
| B | 1766 | 2.30%  | T |
| B | 1764 | 16.00% | A |
| B | 1764 | 84.00% | G |
| B | 1762 | 83.70% | A |
| B | 1762 | 16.20% | T |
| B | 1760 | 99.10% | A |
| B | 1760 | 0.80%  | G |
| C | 1775 | 79.40% | A |
| C | 1775 | 0.50%  | C |
| C | 1775 | 20.10% | G |
| C | 1773 | 97.90% | C |
| C | 1773 | 1.70%  | T |
| C | 1768 | 3.10%  | A |
| C | 1768 | 96.60% | T |
| C | 1766 | 94.80% | C |
| C | 1766 | 5.00%  | T |
| C | 1764 | 50.90% | A |
| C | 1764 | 48.90% | G |
| C | 1762 | 51.90% | A |
| C | 1762 | 47.90% | T |
| C | 1760 | 97.00% | A |
| C | 1760 | 2.80%  | G |
| C | 1758 | 6.00%  | C |
| C | 1758 | 93.20% | T |
| D | 1775 | 98.00% | A |

|   |      |        |   |
|---|------|--------|---|
| D | 1775 | 0.50%  | C |
| D | 1775 | 1.50%  | G |
| D | 1773 | 60.20% | C |
| D | 1773 | 39.70% | T |
| D | 1772 | 98.30% | A |
| D | 1772 | 0.60%  | G |
| D | 1772 | 0.60%  | T |
| D | 1768 | 2.60%  | A |
| D | 1768 | 97.20% | T |
| D | 1766 | 0.80%  | A |
| D | 1766 | 85.90% | C |
| D | 1766 | 9.70%  | G |
| D | 1766 | 3.50%  | T |
| D | 1765 | 0.60%  | G |
| D | 1765 | 99.10% | T |
| D | 1764 | 25.10% | A |
| D | 1764 | 0.70%  | C |
| D | 1764 | 66.80% | G |
| D | 1764 | 7.40%  | T |
| D | 1762 | 76.10% | A |
| D | 1762 | 23.30% | T |
| D | 1761 | 93.40% | A |
| D | 1761 | 6.10%  | C |
| D | 1758 | 1.20%  | C |
| D | 1758 | 98.80% | T |
| E | 1775 | 98.00% | A |
| E | 1775 | 1.60%  | C |
| E | 1773 | 98.80% | C |
| E | 1773 | 1.20%  | T |
| E | 1772 | 98.80% | A |
| E | 1772 | 0.80%  | C |
| E | 1769 | 0.80%  | A |
| E | 1769 | 99.20% | T |
| E | 1768 | 96.50% | C |
| E | 1768 | 3.10%  | G |
| E | 1764 | 12.20% | A |
| E | 1764 | 87.50% | G |
| E | 1762 | 87.10% | A |
| E | 1762 | 0.80%  | C |
| E | 1762 | 11.80% | T |
| E | 1761 | 97.30% | A |
| E | 1761 | 2.40%  | C |
| E | 1760 | 99.20% | A |
| E | 1760 | 0.80%  | G |
| E | 1759 | 2.40%  | C |

|   |      |        |   |
|---|------|--------|---|
| E | 1759 | 97.60% | T |
| F | 1773 | 0.60%  | A |
| F | 1773 | 42.50% | C |
| F | 1773 | 56.90% | T |
| F | 1768 | 3.60%  | A |
| F | 1768 | 96.40% | T |
| F | 1766 | 96.40% | C |
| F | 1766 | 3.60%  | T |
| F | 1765 | 0.80%  | C |
| F | 1765 | 99.20% | T |
| F | 1764 | 24.40% | A |
| F | 1764 | 75.60% | G |
| F | 1762 | 76.00% | A |
| F | 1762 | 24.00% | T |
| G | 1775 | 97.40% | A |
| G | 1775 | 2.60%  | G |
| G | 1773 | 5.10%  | C |
| G | 1773 | 94.90% | T |
| G | 1768 | 2.60%  | A |
| G | 1768 | 97.40% | T |
| G | 1765 | 92.30% | C |
| G | 1765 | 7.70%  | T |
| G | 1764 | 97.40% | A |
| G | 1764 | 2.60%  | G |
| G | 1762 | 2.60%  | A |
| G | 1762 | 97.40% | T |
| H | 1773 | 3.80%  | C |
| H | 1773 | 96.20% | T |
| H | 1768 | 3.80%  | A |
| H | 1768 | 96.20% | T |
| H | 1766 | 96.20% | C |
| H | 1766 | 3.80%  | T |
| H | 1764 | 3.80%  | A |
| H | 1764 | 96.20% | G |
| H | 1762 | 92.30% | A |
| H | 1762 | 7.70%  | T |

15

16 TBP (3): nts 1788-1795

| Genotype | Position | Variant Frequency | Variant Nucleotide(s) |
|----------|----------|-------------------|-----------------------|
| A        | 1790     | 13.00%            | G                     |
| A        | 1790     | 86.80%            | T                     |
| G        | 1795     | 2.60%             | G                     |
| G        | 1795     | 97.40%            | T                     |

17

18

19

20 **Supplementary Table 2.** Single- and multiple-mutation frequencies per genotype.

| HBV Genotype<br>(n)       | A<br>(840) | B<br>(1700) | C<br>(2153) | D<br>(948) | E<br>(255) | F<br>(248) | G<br>(39) | H<br>(26) |
|---------------------------|------------|-------------|-------------|------------|------------|------------|-----------|-----------|
| High-risk HCC mutations:  |            |             |             |            |            |            |           |           |
| C1653T                    | 25 (3%)    | 28 (2%)     | 258 (12%)   | 83 (9%)    | 16 (6%)    | 7 (3%)     | 37 (95%)  | 2 (8%)    |
| T1753V (non-T)            | 62 (7%)    | 83 (5%)     | 411 (19%)   | 164 (17%)  | 38 (15%)   | 32 (13%)   | 2 (5%)    | 3 (12%)   |
| A1762T                    | 236 (28%)  | 273 (16%)   | 1014 (47%)  | 218 (23%)  | 30 (12%)   | 59 (24%)   | 0 (0%)    | 0 (0%)    |
| G1764A                    | 255 (30%)  | 269 (16%)   | 1079 (50%)  | 236 (25%)  | 31 (12%)   | 60 (24%)   | 0 (0%)    | 0 (0%)    |
| 1766T                     | 49 (6%)    | 38 (2%)     | 104 (5%)    | 32 (3%)    | 1 (0%)     | 9 (4%)     | 3 (8%)    | 26 (100%) |
| 1768A                     | 24 (3%)    | 39 (2%)     | 64 (3%)     | 25 (3%)    | 1 (0%)     | 9 (4%)     | 0 (0%)    | 0 (0%)    |
|                           |            |             |             |            |            |            |           |           |
| A1762T+G1764A             | 232 (28%)  | 261 (15%)   | 996 (46%)   | 210 (22%)  | 29 (11%)   | 56 (23%)   | 0 (0%)    | 0 (0%)    |
| 1766T+1768A               | 20 (2%)    | 33 (2%)     | 42 (2%)     | 22 (2%)    | 1 (0%)     | 7 (3%)     | 0 (0%)    | 0 (0%)    |
| C1653T+T1753V             | 6 (1%)     | 8 (0%)      | 36 (2%)     | 12 (1%)    | 4 (2%)     | 2 (1%)     | 0 (0%)    | 0 (0%)    |
| C1653T+A1762T+G1764A      | 0 (0%)     | 11 (1%)     | 230 (11%)   | 29 (3%)    | 4 (2%)     | 5 (2%)     | 0 (0%)    | 0 (0%)    |
| T1753V+A1762T+G1764A      | 0 (0%)     | 54 (3%)     | 366 (17%)   | 123 (13%)  | 11 (4%)    | 40 (16%)   | 0 (0%)    | 0 (0%)    |
| A1762T+G1764A+1766T       | 0 (0%)     | 4 (0%)      | 41 (2%)     | 18 (2%)    | 1 (0%)     | 2 (1%)     | 0 (0%)    | 0 (0%)    |
| A1762T+G1764A+1766T+1768A | 0 (0%)     | 1 (0%)      | 6 (0%)      | 9 (1%)     | 1 (0%)     | 0 (0%)     | 0 (0%)    | 0 (0%)    |
| All 6 mutations           | 0 (0%)     | 0 (0%)      | 0 (0%)      | 1 (0%)     | 1 (0%)     | 0 (0%)     | 0 (0%)    | 0 (0%)    |

21

22

23

24

25

26

27

28

29

30

31

32

33

34

35

36

37

38

39

40
